# Supplementary material for: Childhood behaviour problems predict crime and violence in late adolescence: Brazilian and British birth cohort studies
Source: Springer Nature journal article supplement (doi:10.1007/s00127-014-0976-z), 2014-10-15
Supplement: MOESM1 [file 8100414]

## **ONLINE SUPPLEMENT**

### **CHILDHOOD BEHAVIOUR PROBLEMS PREDICT CRIME AND VIOLENCE IN LATE ADOLESCENCE: BRAZILIAN AND BRITISH BIRTH COHORT STUDIES**

Joseph Murray, Ana M. B. Menezes, Matthew Hickman, Barbara Maughan, Erika Alejandra Giraldo Gallo,  
Alicia Matijasevich, Helen Gonçalves, Luciana Anselmi, Maria Cecília F. Assunção, Fernando C. Barros,  
Cesar G. Victora

**PUBLISHED IN SOCIAL PSYCHIATRY AND PSYCHIATRIC EPIDEMIOLOGY**

**Table S1. Perinatal characteristics by availability of crime data at age 18**

|                                        | PELOTAS          |               | ALSPAC           |               |
|----------------------------------------|------------------|---------------|------------------|---------------|
|                                        | Valid Crime Data | No Crime Data | Valid Crime Data | No Crime Data |
|                                        | N = 3,618        | N = 1,631     | N = 4,012        | N = 10,750    |
|                                        | %                | %             | %                | %             |
| <b>Unplanned pregnancy</b>             | <i>p</i> = .447  |               | <i>p</i> < .001  |               |
| Yes                                    | 55.9             | 57.1          | 24.61            | 33.2          |
| No                                     | 44.1             | 42.9          | 75.4             | 66.8          |
| <b>Ever smoked in pregnancy</b>        | <i>p</i> = .239  |               | <i>p</i> < .001  |               |
| Yes                                    | 32.9             | 34.5          | 15.9             | 28.0          |
| No                                     | 67.1             | 65.5          | 84.1             | 72.0          |
| <b>Alcohol use in pregnancy</b>        | <i>p</i> = .584  |               | <i>p</i> = .287  |               |
| Yes                                    | 5.3              | 5.0           | 8.4              | 7.8           |
| No                                     | 94.7             | 95.0          | 91.6             | 92.2          |
| <b>Urinary infection in pregnancy</b>  | <i>p</i> = .818  |               | <i>p</i> < .001  |               |
| Yes                                    | 33.7             | 33.4          | 11.8             | 14.8          |
| No                                     | 66.3             | 66.7          | 88.2             | 85.2          |
| <b>Intrauterine growth restriction</b> | <i>p</i> = .366  |               | <i>p</i> = .002  |               |
| Yes                                    | 90.8             | 10.0          | 7.5              | 9.2           |
| No                                     | 9.2              | 90.0          | 92.5             | 90.8          |
| <b>Preterm birth (&lt; 37weeks)</b>    | <i>p</i> = .007  |               | <i>p</i> = .853  |               |
| Yes                                    | 10.6             | 13.2          | 5.0              | 6.8           |
| No                                     | 89.4             | 86.8          | 95.0             | 93.2          |
| <b>Maternal age</b>                    | <i>p</i> = .731  |               | <i>p</i> < .001  |               |
| <20                                    | 17.6             | 17.2          | 1.6              | 5.8           |
| ≥20                                    | 82.4             | 82.8          | 98.4             | 94.2          |
| <b>Maternal education</b>              | <i>p</i> = .003  |               | <i>p</i> < .001  |               |
| Low                                    | 26.8             | 30.8          | 11.0             | 24.0          |
| Medium-high                            | 73.2             | 69.2          | 89.0             | 76.0          |
| <b>Marital status</b>                  | <i>p</i> = .397  |               | <i>p</i> < .001  |               |
| Single mother                          | 12.1             | 12.9          | 98.4             | 97.2          |
| With partner                           | 87.9             | 87.1          | 1.6              | 2.8           |
| <b>Three or more siblings</b>          | <i>p</i> = .191  |               | <i>p</i> < .001  |               |
| Yes                                    | 13.5             | 14.8          | 4.1              | 6.6           |
| No                                     | 86.5             | 85.2          | 95.9             | 93.4          |
| <b>Family income</b>                   | <i>p</i> = .006  |               | <i>p</i> < .001  |               |
| Lowest quintile                        | 19.1             | 22.4          | 14.4             | 23.0          |
| Second-fifth quintile                  | 81.0             | 77.7          | 85.7             | 77.0          |

Note. Total samples (males and females combined). *p* values refer to Chi-square tests comparing percentages within Pelotas and ALSPAC.

**Table S2. Prevalence of adolescent crime by four categories of childhood behaviour scores**

|                | Conduct Problem Score |      |      |      |                | Hyperactivity Score |      |      |      |                |
|----------------|-----------------------|------|------|------|----------------|---------------------|------|------|------|----------------|
|                | 0-1                   | 2-3  | 4-5  | 6-10 | <i>p</i> value | 0-1                 | 2-3  | 4-5  | 6-10 | <i>p</i> value |
|                | % Nonviolent crime    |      |      |      |                | % Nonviolent crime  |      |      |      |                |
| <b>ALL</b>     |                       |      |      |      |                |                     |      |      |      |                |
| Pelotas        | 3.9                   | 5.9  | 8.4  | 10.8 | <.001          | 3.0                 | 3.4  | 6.7  | 9.1  | <.001          |
| ALSPAC         | 11.8                  | 15.1 | 21.3 | 35.7 | <.001          | 10.5                | 14.2 | 14.2 | 19.3 | <.001          |
| <b>FEMALES</b> |                       |      |      |      |                |                     |      |      |      |                |
| Pelotas        | 1.3                   | 2.3  | 5.0  | 5.5  | <.001          | 1.4                 | 1.3  | 3.3  | 4.3  | <.001          |
| ALSPAC         | 7.9                   | 10.9 | 13.4 | 33.3 | <.001          | 7.6                 | 9.8  | 10.6 | 13.0 | .021           |
| <b>MALES</b>   |                       |      |      |      |                |                     |      |      |      |                |
| Pelotas        | 7.11                  | 9.51 | 11.6 | 15.6 | <.001          | 5.4                 | 6.8  | 9.8  | 12.8 | <.001          |
| ALSPAC         | 16.6                  | 20.7 | 30.1 | 38.5 | <.001          | 16.2                | 19.1 | 17.6 | 23.5 | .091           |
|                | Conduct Problem Score |      |      |      |                | Hyperactivity Score |      |      |      |                |
|                | 0-1                   | 2-3  | 4-5  | 6-10 | <i>p</i> value | 0-1                 | 2-3  | 4-5  | 6-10 | <i>p</i> value |
|                | % Violent crime       |      |      |      |                | % Violent crime     |      |      |      |                |
| <b>ALL</b>     |                       |      |      |      |                |                     |      |      |      |                |
| Pelotas        | 10.9                  | 16.5 | 20.0 | 23.8 | <.001          | 10.0                | 11.1 | 14.9 | 22.0 | <.001          |
| ALSPAC         | 5.0                   | 8.9  | 11.6 | 14.3 | <.001          | 4.3                 | 6.6  | 6.2  | 14.0 | <.001          |
| <b>FEMALES</b> |                       |      |      |      |                |                     |      |      |      |                |
| Pelotas        | 5.4                   | 8.6  | 14.0 | 14.8 | <.001          | 5.7                 | 6.1  | 6.4  | 14.8 | <.001          |
| ALSPAC         | 2.0                   | 4.4  | 2.4  | 13.3 | .004           | 2.5                 | 1.9  | 4.5  | 4.4  | .091           |
| <b>MALES</b>   |                       |      |      |      |                |                     |      |      |      |                |
| Pelotas        | 17.9                  | 24.3 | 25.7 | 32.1 | <.001          | 16.8                | 19.1 | 22.6 | 27.7 | <.001          |
| ALSPAC         | 8.7                   | 14.8 | 21.9 | 15.4 | <.001          | 7.8                 | 11.8 | 7.8  | 20.6 | .002           |

Note. *p* value for linear trend

**Table S3. Associations between childhood behaviour problems and crime, adjusted for confounders, using complete cases**

|                              |                      | PELOTAS       |                | ALSPAC        |                | PELOTAS-ALSPAC Interaction |                |
|------------------------------|----------------------|---------------|----------------|---------------|----------------|----------------------------|----------------|
|                              |                      | RR (95% CI)   | <i>p</i> value | RR (95% CI)   | <i>p</i> value | RRR (95% CI)               | <i>p</i> value |
| <b>FEMALES</b>               |                      |               |                |               |                |                            |                |
| <b>Behavioural Predictor</b> | <b>Crime Outcome</b> |               |                |               |                |                            |                |
| Conduct                      | Nonviolent           | 2.7 (1.4-5.3) | .005           | 1.8 (0.6-1.9) | .057           | 1.5 (0.6-3.7)              | .397           |
| Hyperactive                  | Nonviolent           | 1.5 (0.7-3.0) | .299           | 1.0 (0.5-0.1) | .925           | 1.4 (0.5-4.3)              | .556           |
| Conduct                      | Violent              | 1.5 (1.0-2.0) | .029           | 1.6 (0.8-0.9) | .361           | 0.9 (0.6-1.3)              | .601           |
| Hyperactive                  | Violent              | 2.0 (1.4-2.8) | <.001          | 1.2 (1.0-0.3) | .780           | 1.6 (0.8-3.3)              | .195           |
| <b>MALES</b>                 |                      |               |                |               |                |                            |                |
| <b>Behavioural Predictor</b> | <b>Crime Outcome</b> |               |                |               |                |                            |                |
| Conduct                      | Nonviolent           | 1.4 (1.0-1.9) | .082           | 1.4 (0.4-1.4) | .173           | 1.0 (0.5-2.0)              | .921           |
| Hyperactive                  | Nonviolent           | 1.3 (0.9-1.8) | .126           | 1.2 (0.3-0.9) | .390           | 1.0 (0.6-1.9)              | .890           |
| Conduct                      | Violent              | 1.2 (1.0-1.5) | .094           | 1.4 (0.2-1.7) | .082           | 0.9 (0.3-2.4)              | .794           |
| Hyperactive                  | Violent              | 1.3 (1.1-1.6) | .007           | 1.3 (0.2-1.5) | .126           | 1.0 (0.4-2.7)              | .984           |

N = 1,701 females and 1,587 males in Pelotas, 1,211 females and 976 males in ALSPAC.

RR = Risk ratio adjusted for conduct and hyperactive problems age 11; unplanned pregnancy, ever smoked in pregnancy, alcohol use in pregnancy, urinary infection in pregnancy, intrauterine growth restriction, premature birth, maternal age, maternal education, marital status, 3+ siblings, low family income, parental crime birth-age11, maternal mental health age 11, child age in months at time of crime assessment  
CI = Confidence Interval

RRR = Ratio of adjusted risk ratios = RR for Pelotas divided by RR for ALSPAC
